# Supplementary material for: Effects of atmospheric CO 2 variability of the past 800 kyr on the biomes of southeast Africa
Source: Copernicus journal article supplement (doi:10.5194/cp-15-1083-2019), 2019-06-19

**Supplementary Figure 3: E-Mountain-Forest**

Endmember assemblage scores and selected pollen taxa for E-Mountain-Forest (filled curves) against age in ka. On top Terminations and even-numbered marine isotope stages (MIS) of the Brunhes Chron are indicated. Stable oxygen isotopes of benthic foraminifers of Core MD96-2048 (violet line) and of global stack LR04 (black line, Lisiecki & Raymo 2005).

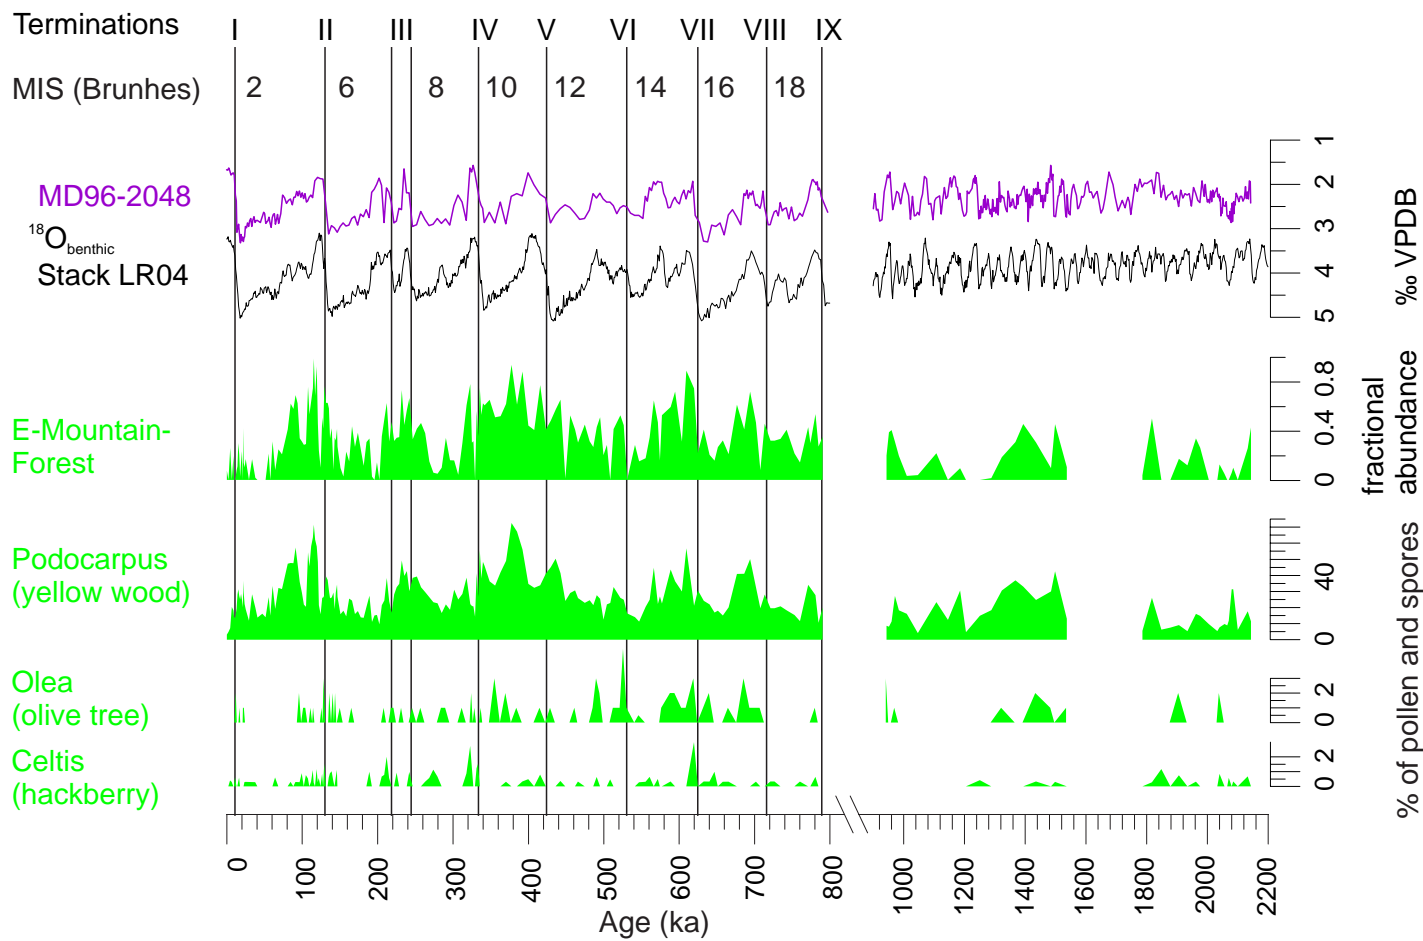

Supplement: Supplementary file 3 [file SFig3 E-Mountain-Forest.pdf › SFig3 E-Mountain-Forest.pdf]
