# Supplementary material for: Effects of atmospheric CO 2 variability of the past 800 kyr on the biomes of southeast Africa
Source: Copernicus journal article supplement (doi:10.5194/cp-15-1083-2019), 2019-06-19

Supplementary Figure 5: E-Woodland

Endmember assemblage scores and selected pollen taxa for E-Woodland (filled curves) against age in ka. On top interglacial peaks of marine isotope stages (MIS) of the Brunhes Chron are indicated. Stable oxygen isotopes of benthic foraminifers of Core MD96-2048 (violet line) and of global stack LR04 (black line, Lisiecki & Raymo 2005).

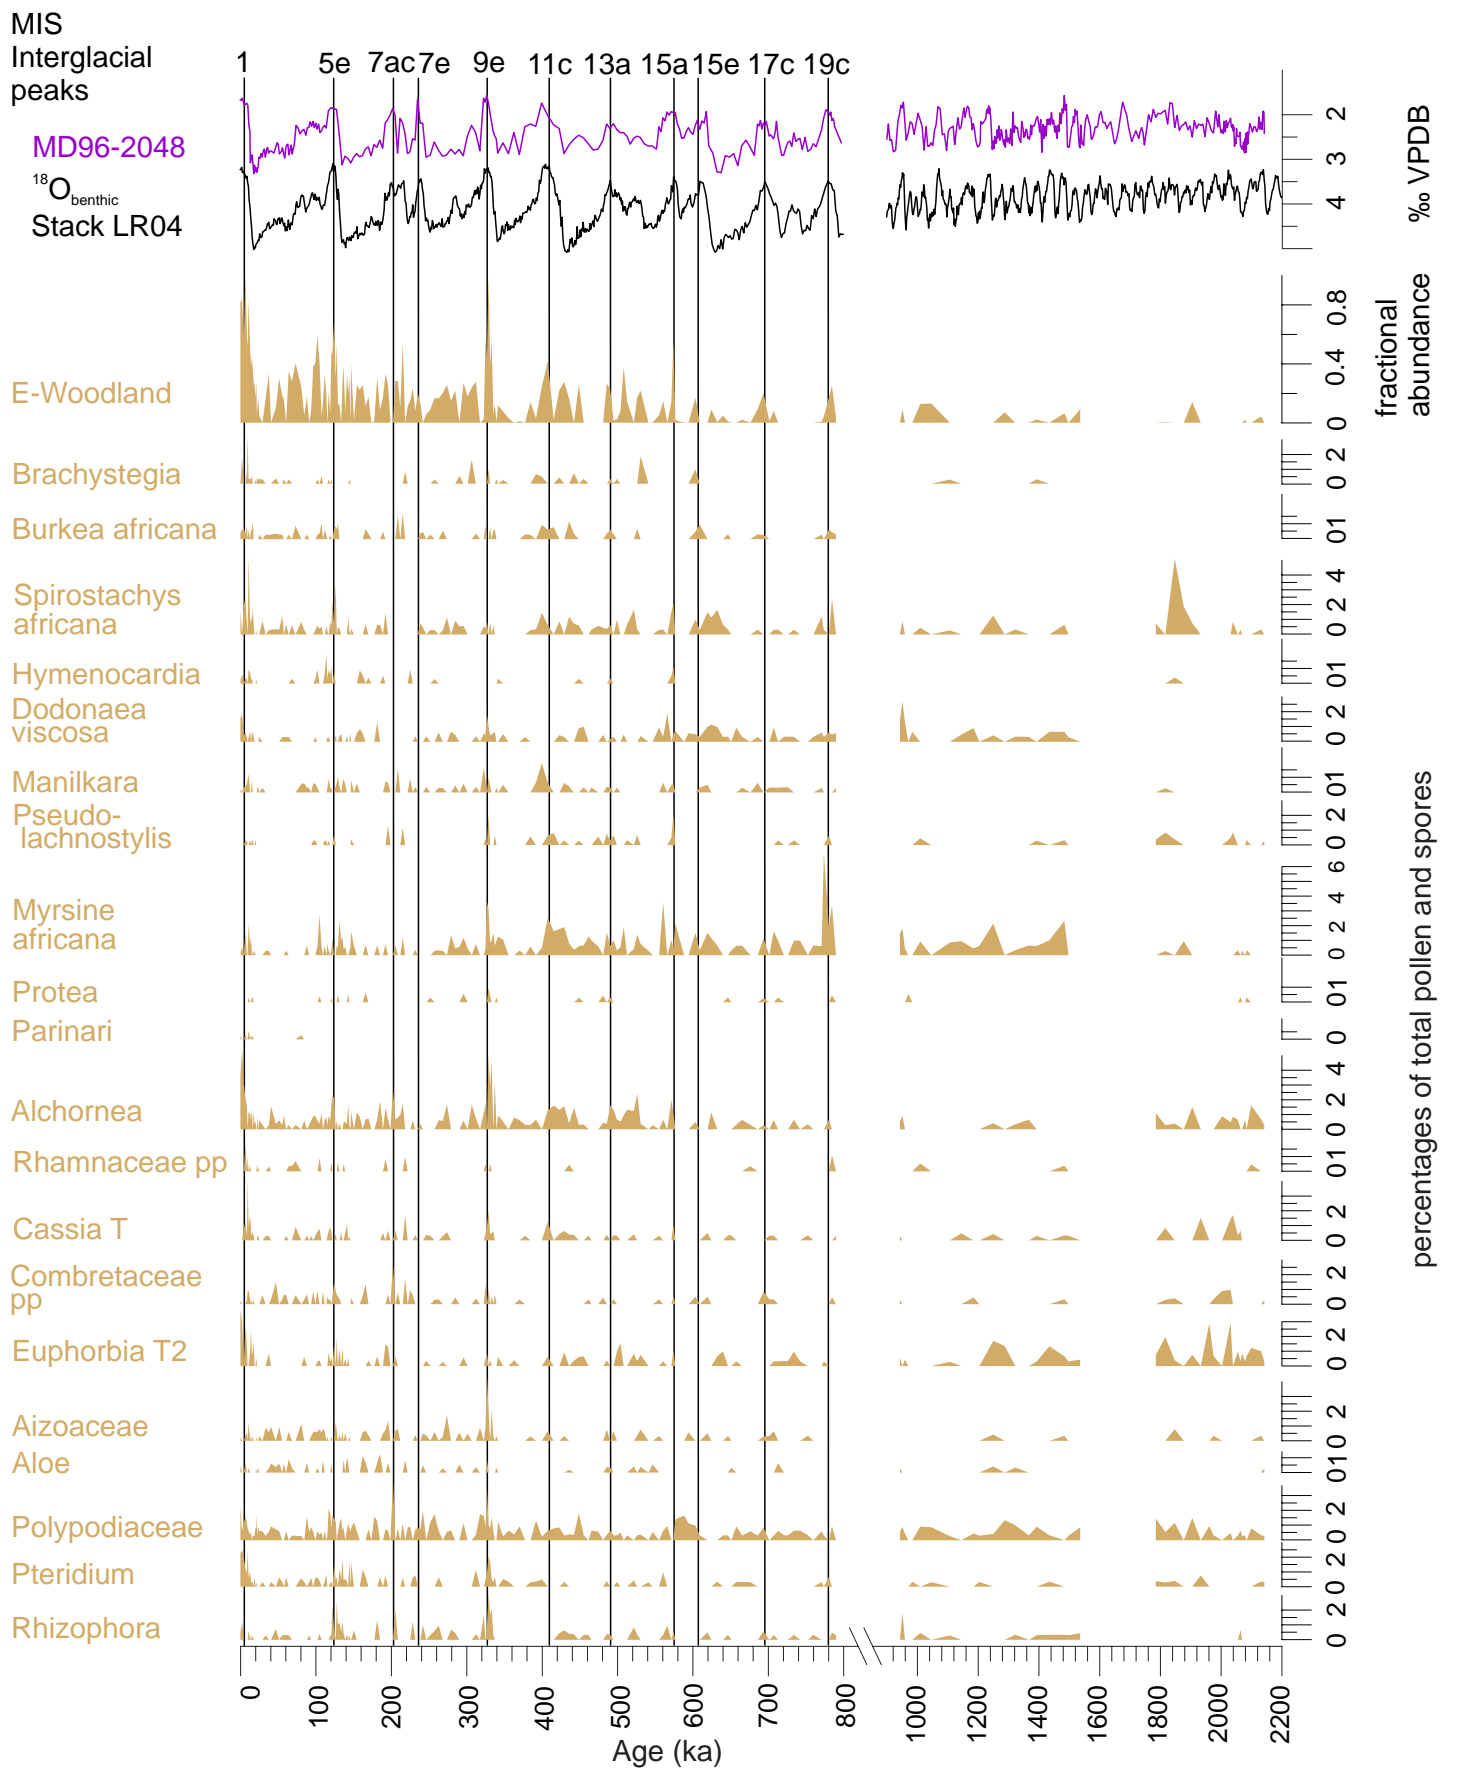

Supplement: Supplementary file 5 [file SFig5 E-Woodland.pdf › SFig5 E-Woodland.pdf]
