# Supplementary material for: Effects of atmospheric CO 2 variability of the past 800 kyr on the biomes of southeast Africa
Source: Copernicus journal article supplement (doi:10.5194/cp-15-1083-2019), 2019-06-19
Supplement: Supplementary file [file cp-15-1083-2019-supplement-title-page.pdf › cp-15-1083-2019-supplement-title-page.pdf]

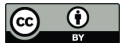

## *Supplement of*

# **Effects of atmospheric CO<sub>2</sub> variability of the past 800 kyr on the biomes of southeast Africa**

**Lydie M. Dupont et al.**

*Correspondence to:* Lydie M. Dupont ([ldupont@marum.de](mailto:ldupont@marum.de))

- [cp-15-1083-2019-supplement-title-page.pdf](#)
- [SFig1 RedFit.pdf](#)
- [SFig2 E-Heathland.pdf](#)
- [SFig3 E-Mountain-Forest.pdf](#)
- [SFig4 E-Shrubland.pdf](#)
- [SFig5 E-Woodland.pdf](#)
- [Supplementary Tabela.xlsx](#)

The copyright of individual parts of the supplement might differ from the CC BY 4.0 License.
